# Supplementary material for: Experimental investigation of the low temperature oil-on-water cooling and lubrication in turning the hardened AISI D2 steel
Source: Research Square preprint supplement (doi:10.21203/rs.3.rs-1425393/v1), 2022-03-11
Supplement: Supplementary file 1 [file e3d14b198f7f1bc9938b3bce.docx]

**Tab. 5** Wear morphology of the rake and flank wear of PCBN at the condition of the LTOoW mist cooling and lubricating

| ***Cutting speed (m/min)*** | ***Macrograph of flank wear*** | ***Macrograph of rake face wear*** |
| --- | --- | --- |
| ***55*** | ***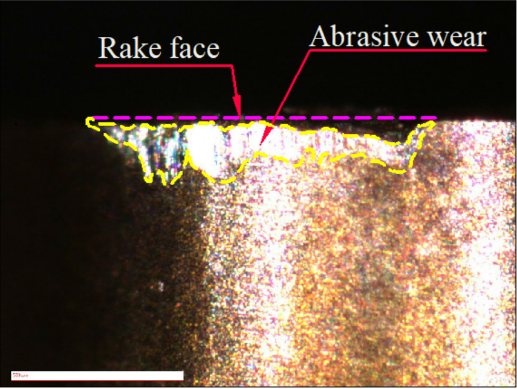*** | ***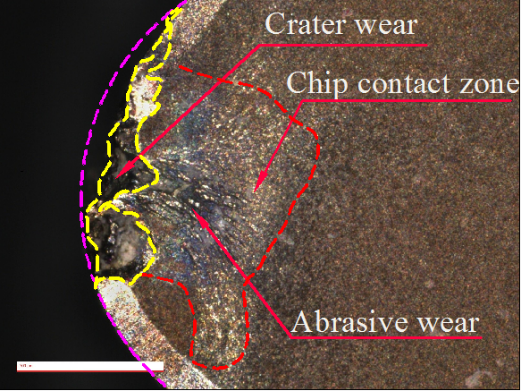*** |
| ***140*** | ***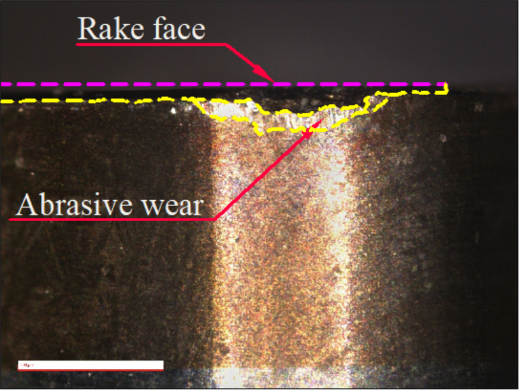*** | ***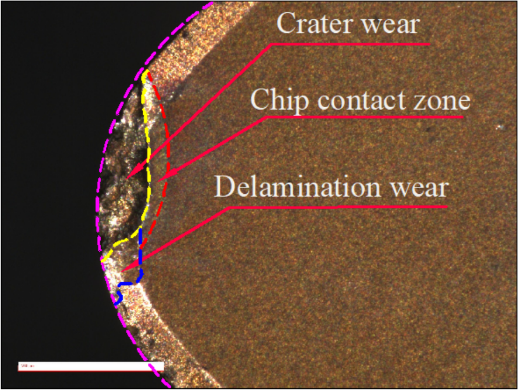*** |
| ***249*** | ***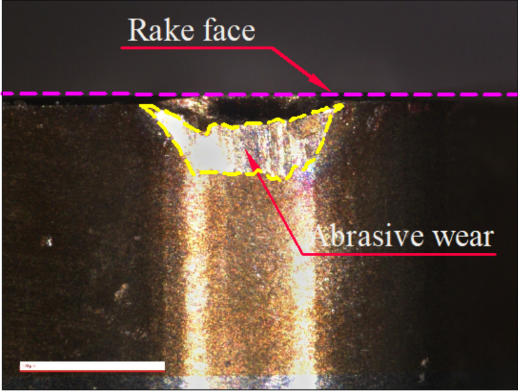*** | ***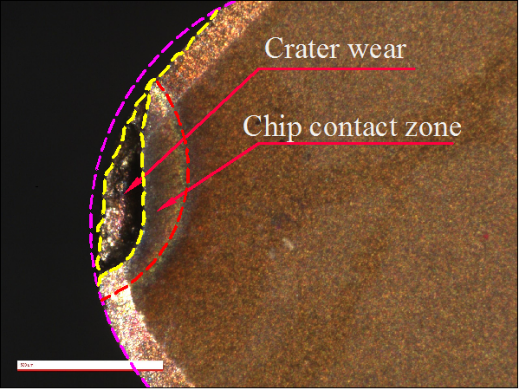*** |
| ***395*** | ***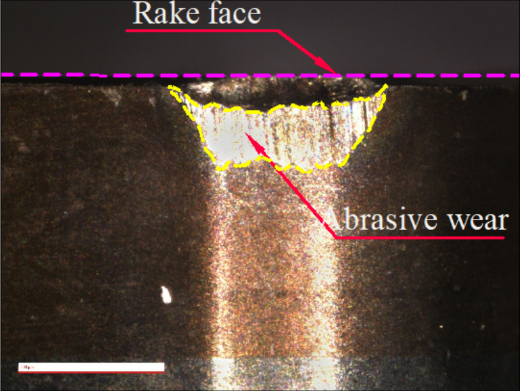*** | ***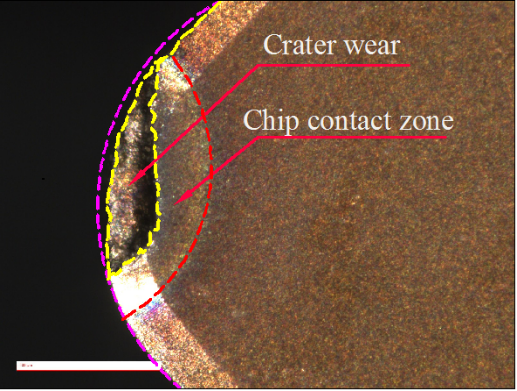*** |
| ***495*** | ***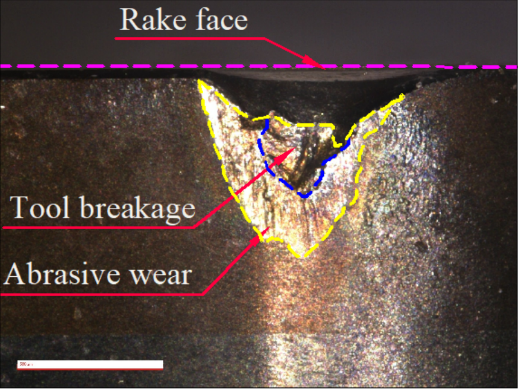*** | ***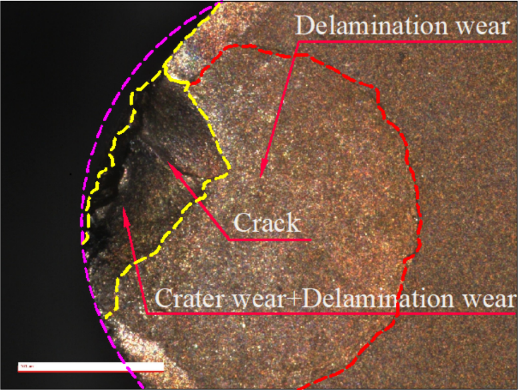*** |
